# Supplementary material
Source: PubMed Central journal article supplement (PMC4011464)
Supplement: supp_WNL.0000000000000364_Figure_e-1.pdf [file supp_WNL.0000000000000364_Figure_e-1.pdf]

**Figure e-1. Discontinuation of subjects**

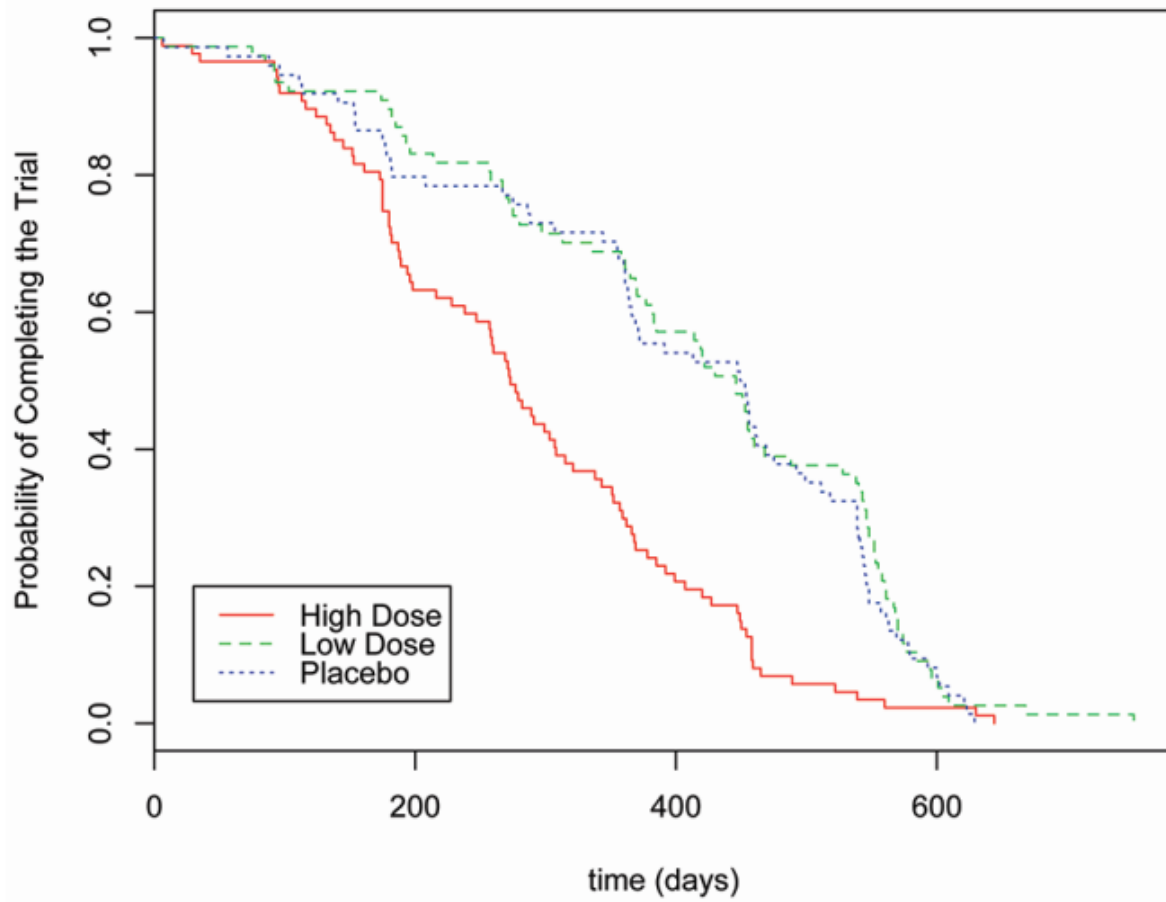

Supplementary Figure e-1. Time to discontinuation by group:

Survival analysis of subjects randomized to each treatment group versus time to discontinuation.
